# Supplementary material for: Multi-Omics Data Integration Reveals Sex-Dependent Hippocampal Programming by Maternal High-Fat Diet during Lactation in Adult Mouse Offspring
Source: Preprints.org preprint supplement (doi:10.20944/preprints202310.0544.v1), 2023-10-09
Supplement: Supplementary file 1 [file supplementary]

**Supplementary Material:**

|  | **Control diet** | **High-fat diet** | **Standard diet** |
| --- | --- | --- | --- |
| Period | P0 until P1 | | P21 until sacrifice |
| Reference | SAFE A03 | Research diets D12331 | SAFE A04 |
| % protein | 25.2 | 16.5 | 19.3 |
| % lipid | 13.5 | 58.0 | 8.4 |
| % carbohydrates | 61.3 | 25.5 | 72.4 |
| Kcal/Kg | 3395 | 5558.5 | 3339 |

**
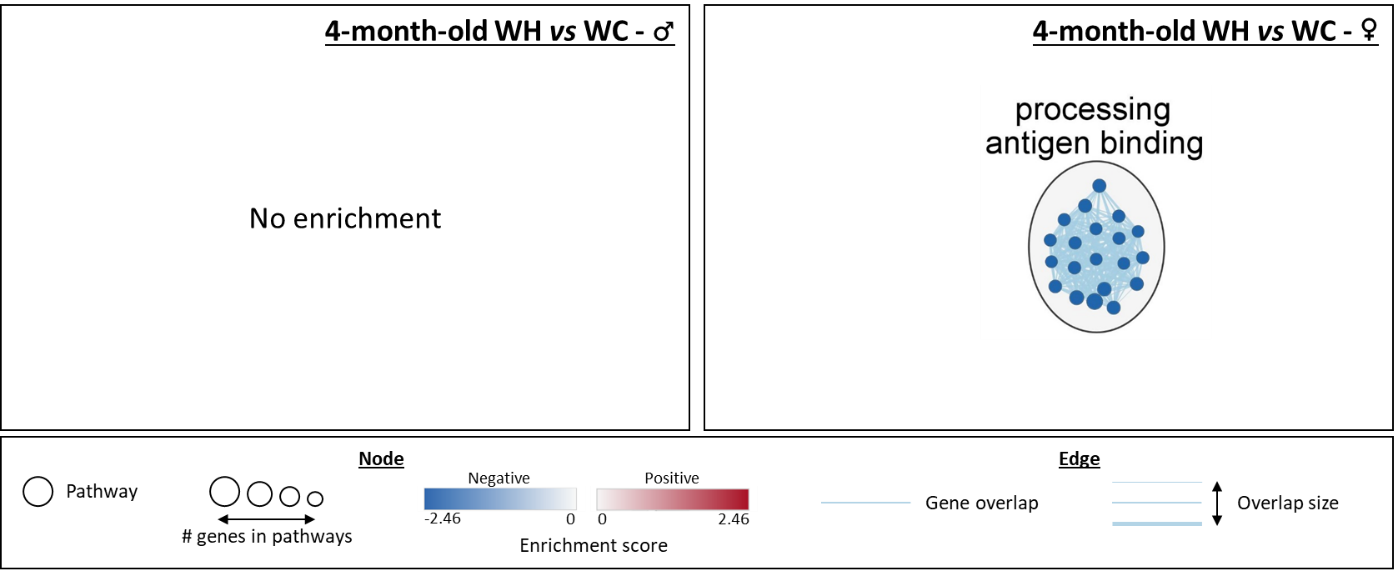

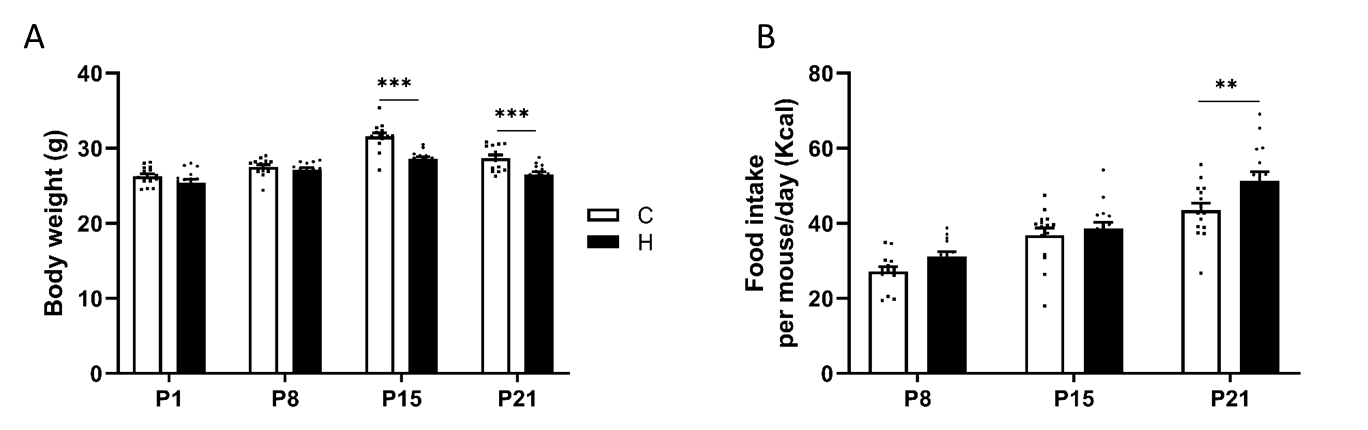
Supplementary table 1: Diet composition.** Percentages of protein, fat and carbohydrates in each diet, and associated total amount of kilocalories per kilogram of body weight.

**Supplementary data 2: Network analysis of gene set enrichment analysis (GSEA) results from the hippocampal transcriptome of 4-month-old male and female offspring.** The network, built using Cytoscpape, shows gene ontology (GO) terms significantly enriched (false discovery rate < 0.25) in terms of cellular components, biological pathways and molecular functions in GSEA (males on the left and females on the right). Groups with fewer than 5 gene sets were deleted.

**Supplementary data 1: Body weight and food intake of dams during lactation.** (A) Body weight of dams that fed a chow (C) or high-fat (H) diet during lactation at different post-natal day (P1, P8, P15 and P21). (B) Food intake of dams that fed a C or H diet during lactation at different post-natal day (P8, P15 and P21). Values are represented as mean ± SEM. **p < 0.01, ***p < 0.001 *vs* C mice using two-way ANOVA followed by Tukey’s *post hoc* test.

SEM. **p < 0.01, ***p < 0.001 *vs* C mice using two-way ANOVA followed by Tukey’s *post hoc* test.

**Supplementary data 2: Network analysis of gene set enrichment analysis (GSEA) results from the hippocampal transcriptome of 4-month-old male and female offspring.** The network, built using Cytoscpape, shows gene ontology (GO) terms significantly enriched (false discovery rate < 0.25) in terms of cellular components, biological pathways and molecular functions in GSEA (males on the left and females on the right). Groups with fewer than 5 gene sets were deleted.


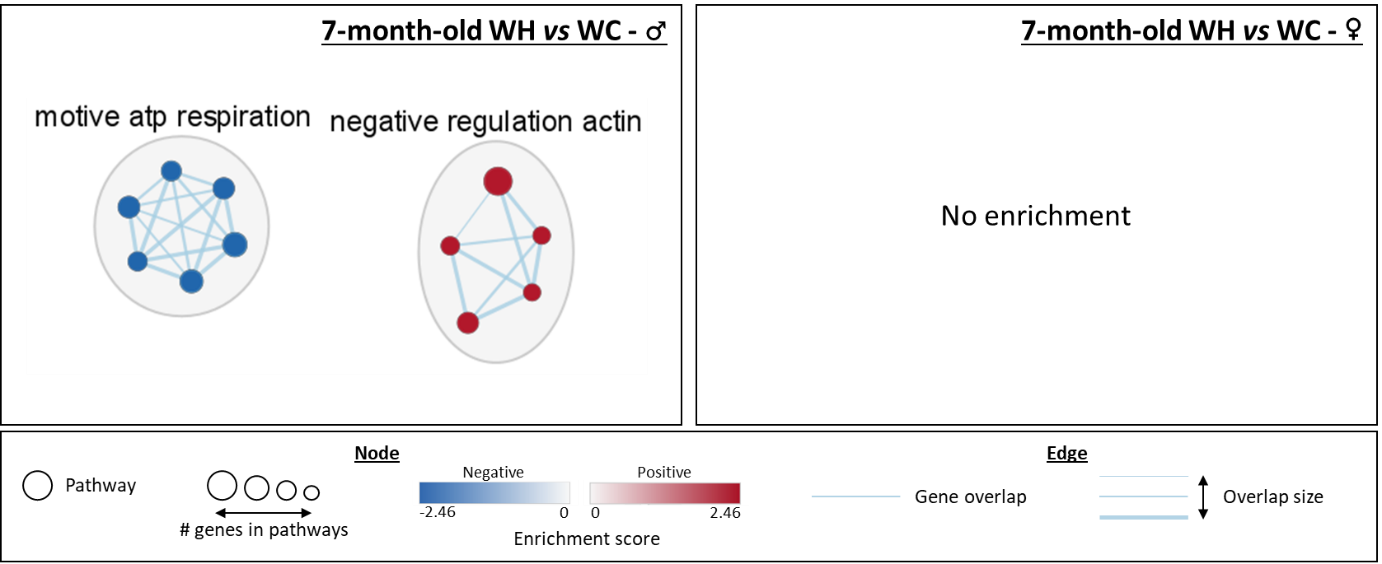


**Supplementary data 3: Network analysis of gene set enrichment analysis (GSEA) results from the hippocampal proteomic of 7-month-old male and female offspring.** The network, built using Cytoscpape, shows gene ontology (GO) terms significantly enriched (false discovery rate < 0.25) in terms of cellular components, biological pathways and molecular functions in GSEA (males on the left and females on the right). Groups with fewer than 5 gene sets were deleted.
